# Supplementary material
Source: HighWire-hosted journal article supplement (http://www.cmaj.ca/highwire/filestream/80273/field_highwire_adjunct_files/4/210053-res-5-at.pdf)
Supplement: 210053-res-5-at.pdf [file 210053-res-5-at.pdf]

## Appendix 5

### Supplementary Table S2. Sensitivity analysis comparing admissions with versus without concurrent paediatric inflammatory multisystem syndrome (PIMS).

| Characteristics, n (%) <sup>1</sup>                | All Cases <sup>2</sup> | All Cases, PIMS excluded |
|----------------------------------------------------|------------------------|--------------------------|
| <b>Admissions attributable to COVID-19, N</b>      | 150                    | 135                      |
| <b>Age of child<sup>3</sup></b>                    |                        |                          |
| Infants (<1 year)                                  | 63 (42.3)              | 62 (46.3)                |
| Preschool (1-5 years)                              | 23 (15.4)              | 21 (15.7)                |
| School age (6-12 years)                            | 27 (18.1)              | 21 (15.7)                |
| Adolescents (13-17 years)                          | 36 (24.2)              | 30 (22.4)                |
| <b>Any comorbid condition</b>                      | 59 (39.3)              | 54 (40.0)                |
| <b>Clinical presentation<sup>4</sup></b>           |                        |                          |
| Non-severe                                         | 75 (50.0)              | 71 (52.6)                |
| Severe                                             | 75 (50.0)              | 64 (47.4)                |
| <b>Respiratory or hemodynamic support required</b> | 42 (28.0)              | 32 (23.7)                |
| <b>Intensive care required</b>                     | 32 (21.3)              | 23 (17.0)                |
| <b>Select complications</b>                        |                        |                          |
| Pneumonia                                          | 26–29 (17.3–19.3)      | 24 (17.8)                |
| Coagulopathy                                       | 15–18 (10.0–12.0)      | 11 (8.1)                 |
| Hepatitis                                          | 16–19 (10.7–12.7)      | 9 (6.7)                  |
| Hypotension                                        | 17 (11.3)              | 8 (5.9)                  |
| Renal dysfunction                                  | 12 (8.0)               | 8 (5.9)                  |
| Cytokine storm/Macrophage activating syndrome      | 10 (6.7)               | <5 (<3.7)                |
| Acute respiratory distress syndrome                | 9–12 (6.0–8.0)         | <5 (<3.7)                |
| <b>Treatments received</b>                         |                        |                          |
| Antibiotics (e.g. ceftriaxone)                     | 81 (54.0)              | 69 (51.1)                |
| Steroids                                           | 33–36 (22.0–24.0)      | 25 (18.5)                |
| Immunoglobulin (IV)                                | 16–19 (10.7–12.7)      | 5 (3.7)                  |
| Bronchodilators                                    | 15–18 (10.0–12.0)      | 16 (11.9)                |
| Anticoagulation                                    | 12–15 (8.0–10.0)       | 7 (5.2)                  |
| ASA                                                | 9–12 (6.0–8.0)         | <5 (<3.7)                |
| Azithromycin                                       | 9 (6.0)                | 7 (5.2)                  |

<sup>1</sup>Percentages were calculated as those known to have experienced a clinical feature, divided by all admissions in the column total.

<sup>2</sup>Some statistics are presented as ranges to prevent back-calculation of cells in conjunction with Tables 2 and 5.

<sup>3</sup>Age was unknown for one child overall.

<sup>4</sup>Defined using criteria modified from Dong et al. (2020). Non-severe disease combines mild, and moderate illness; severe disease combines severe and critical illness.

## References

1. Dong Y, Mo X, Hu Y, et al. Epidemiology of COVID-19 among children in China. *Pediatrics* 2020;145:e20200702.
